# Supplementary material
Source: PubMed Central journal article supplement (PMC2765551)
Supplement: NIHMS128188-supplement-1_si_001.pdf [file NIHMS128188-supplement-1_si_001.pdf]

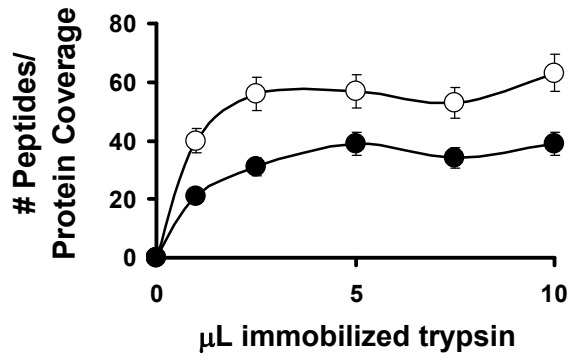

Comparison of the number of uniquely identified peptides and BSA amino acid coverage at different volumes of immobilized trypsin 1, 2.5, 5, 7.5 and 10  $\mu\text{L}$ . Empty circles correspond to protein coverage. Filled circles correspond to number of identified peptides.

## Supplementary Figure 1
